# Supplementary material for: Population Health Risks Assessment from Air Pollution Exposure in an Industrialized Residential Area in Greece
Source: MDPI journal article supplement (doi:10.3390/atmos13040615), 2022-04-11
Supplement: s1 [file s1]

# Supplementary Materials: Population Health Risks Assessment from Air Pollution Exposure in an Industrialized Residential Area in Greece

Michail Pachoulis <sup>1</sup>, Thomas Maggos <sup>1</sup>, Panagiotis Panagopoulos <sup>1</sup>, Maria Dasopoulou <sup>1</sup>, Dimitra Balla <sup>1</sup>, Asimina Stamatelopoulou <sup>1</sup>, Manousos-Ioannis Manousakas <sup>2,3</sup>, Konstantinos Eleftheriadis <sup>2</sup> and Dikaia Saraga <sup>1,\*</sup>

## GLOSSARY

PM: Particulate Matter  
 IARC: International Agency for Research on Cancer  
 PAHs: Polycyclic Aromatic Hydrocarbons  
 DALYs: Disability Adjusted Life Years  
 VOCs: Volatile Organic Compounds  
 SVOCs: Semivolatile Organic Compounds  
 IR: Inhalation Rate  
 BW: Body weight  
 CR: Cancer Risk  
 OEHA: Office of Environmental Health Hazard Assessment  
 PEF: Potency Equivalency Factor  
 SF: Slope Factor  
 EF: Exposure Factor  
 AF: Adjustment Factor  
 ED: Exposure Duration  
 AT: Averaging Time  
 RPF: Relative Potency Factor  
 ASF: Age Sensitivity Factor  
 FAH: Fraction At Home  
 RfD: Reference Dose  
 RR: Relative Risk  
 CDI: Chronic Daily Intake  
 IUR: Inhalation Unit Risk  
 EC: Exposure Concentration

**Table S1.** Values of the limit of detection (LOD), the limit of quantitation (LOQ) and the expanded uncertainty at 95% confidence level and  $k = 2$  that has been estimated experimentally ( $U_{exp}$ ) for each detected PAH.

|                      | LOD  | LOQ  | % $U_{exp}$ ( $k=2$ ) |
|----------------------|------|------|-----------------------|
| Acenaphthene         | 0.39 | 1.29 | 13.0                  |
| Acenaphthylene       | 0.24 | 0.79 | 6.11                  |
| Anthracene           | 0.45 | 1.49 | 6.77                  |
| Benz(a)anthracene    | 0.19 | 0.63 | 23.1                  |
| Benzo(a)pyrene       | 0.72 | 2.38 | 11.6                  |
| Benzo(e)pyrene       | 1.12 | 3.7  | 14.1                  |
| Benzo(b)fluoranthene | 1.00 | 3.3  | 13.9                  |

|                          |      |      |      |
|--------------------------|------|------|------|
| Benzo(k)fluoranthene     | 0.78 | 2.57 | 26.0 |
| Benzo(ghi)perylene       | 0.59 | 1.95 | 11.3 |
| Chrysene                 | 0.3  | 0.99 | 8.58 |
| Dibenzo(a,h)anthracene   | 0.44 | 1.45 | 16.5 |
| Fluoranthrene            | 0.48 | 1.58 | 10.4 |
| Fluorene                 | 0.41 | 1.35 | 9.19 |
| Perylene                 | 0.59 | 1.95 | 15.9 |
| Indeno(1,2,3-c,d)pyrene  | 0.91 | 3.00 | 21.9 |
| Phenanthrene             | 0.57 | 1.88 | 14.5 |
| Pyrene                   | 0.39 | 1.29 | 6.27 |
| 3,6-dimethylphenanthrene | 0.43 | 1.42 | 12.3 |
| 1-methylphenanthrene     | 0.53 | 1.75 | 7.71 |

**Table S2.** Description of gaseous pollutant recording methods.

| Parameter                                 | Measurement principle                                 | Measurement standard |
|-------------------------------------------|-------------------------------------------------------|----------------------|
| VOC's & SVOC's                            | Chromatographic: Sapling with                         | ISO 16017 – 1:2001   |
|                                           | Sorbent Tubes and analysis with<br>TDS GC/FID & GC/MS |                      |
| Chemical composition<br>PM <sub>2.5</sub> | PAHs (B[a]P)                                          | EN 12884:2000        |
| Chemical composition<br>PM <sub>2.5</sub> | Heavy metals (Zn, Cu, Pd, Ni,<br>Cd, As, Hg)          | EN 14902:2005        |

**Table S3.** PAHs, PEF & SF (OEHHA, 2015 & 2019) [21,37].

| PAH                    | PEF  | Inhalation Slope Factor (mg/kg-day) <sup>-1</sup> |
|------------------------|------|---------------------------------------------------|
| benzo[a]pyrene         | 1.00 | 3.9                                               |
| benz[a]anthracene      | 0.10 | 3.9 X 10 <sup>-1</sup>                            |
| benzo[b]fluoranthene   | 0.10 | 3.9 X 10 <sup>-1</sup>                            |
| benzo[k]fluoranthene   | 0.10 | 3.9 X 10 <sup>-1</sup>                            |
| dibenz[a,h]anthracene  | 5.00 | 4.1 X 10 <sup>+0</sup>                            |
| indeno[1,2,3-cd]pyrene | 0.10 | 3.9 X 10 <sup>-1</sup>                            |
| chrysene               | 0.01 | 3.9 X 10 <sup>-2</sup>                            |

**Table S4.** Studies were used for risk assessment of cancer and non cancer effects.

| Methodology | Study                            |
|-------------|----------------------------------|
| A.I         | R.M. Maertens et al., 2008 [13]  |
| A.II        | R.M. Maertens et al., 2004 [12]  |
| A.III       | M.M. Jackson et al., 2005 [30]   |
| A.IV        | P. Gao et al., 2019 [4]          |
| B.I         | OEHHA (2015) [24]                |
| B.II        | T. Shao et al., 2018 [14]        |
| B.III       | E. Chalvatzaki et al., 2019 [25] |
| B.IV        | L. Megido et al., 2017 [26]      |

|      |                                                                  |
|------|------------------------------------------------------------------|
| C.I  | T. Xu et al., 2018 & F.F. Farris et al., 2014 [48,23]            |
| C.II | R.M. Maertens et al., 2004 and F.F. Farris et al., 2014, [12,23] |

**Table S5.** Cancer potency factor, OEHHA (2015 & 2019) [24,43].

| Chemicals               | Cancer potency factors (mg/kg-day) <sup>-1</sup> |
|-------------------------|--------------------------------------------------|
| Benzo[a]pyrene          | $3.9 \times 10^{-10}$                            |
| benz[a]anthracene       | $3.9 \times 10^{-11}$                            |
| Benzo[b]fluoranthrene   | $3.9 \times 10^{-11}$                            |
| Benzo[k]fluoranthrene   | $3.9 \times 10^{-11}$                            |
| Chrysene                | $3.9 \times 10^{-12}$                            |
| Dibenz[a,h]anthracene   | $4.1 \times 10^{-10}$                            |
| Indeno[1,2,3-c,d]pyrene | $3.9 \times 10^{-11}$                            |
| Nickel (and compounds)  | $9.1 \times 10^{-11}$                            |
| Lead (and compounds)    | $4.2 \times 10^{-12}$                            |
| Benzene                 | $1.0 \times 10^{-11}$                            |

**Table S6.** Concentrations, Acute RELs & Target Organ System(s) (OEHHA Appendices, 2015) [34].

| Substance | Maximum 1-hour concentration ( $\mu\text{g}/\text{m}^3$ ) | Acute REL ( $\mu\text{g}/\text{m}^3$ ) | Target Organ System(s)                                                |
|-----------|-----------------------------------------------------------|----------------------------------------|-----------------------------------------------------------------------|
| Benzene   | 1,39                                                      | 27                                     | Reproductive/Development<br>Immune System<br>Hematologic System       |
| Toluene   | 3,56                                                      | 37000                                  | Reproductive/Development<br>Nervous System<br>Respiratory System Eyes |
| Xylene 1  | 3,08                                                      | 22000                                  | Nervous System<br>Respiratory System Eyes                             |
| Xylene 2  | 2,76                                                      | 22000                                  |                                                                       |
| Xylene 3  | 7,53                                                      | 22000                                  |                                                                       |

**Table S7.** Parameters for non – cancer risks.

| Pollutants   | C ( $\text{ng}/\text{m}^3$ ) | RFC ( $\text{mg}/\text{m}^3$ ) | IR <sub>d</sub> (0-16 yrs)                           |                                                                     |                                                                     |
|--------------|------------------------------|--------------------------------|------------------------------------------------------|---------------------------------------------------------------------|---------------------------------------------------------------------|
|              |                              |                                | Kids                                                 | Women                                                               | Men                                                                 |
| BaP          | 0,059                        | $2 \times 10^{-6}$             | For 24hrs IR <sub>d</sub> : 10,8 m <sup>3</sup> /day | For 24hrs & 14hrs IR <sub>d</sub> : 12,6 & 7,35 m <sup>3</sup> /day | For 24hrs & 14hrs IR <sub>d</sub> : 16,4 & 9,57 m <sup>3</sup> /day |
| Ni           | 4,38                         | $2 \times 10^{-5}$             |                                                      |                                                                     |                                                                     |
| Pb           | 8,03                         | $2 \times 10^{-4}$             |                                                      |                                                                     |                                                                     |
| Benzene      | 1390                         | $3 \times 10^{-2}$             |                                                      |                                                                     |                                                                     |
| Toluene      | 3563                         | $5 \times 10^{-10}$            |                                                      |                                                                     |                                                                     |
| Trimethylben | 2300                         | $6 \times 10^{-2}$             |                                                      |                                                                     |                                                                     |
| m-Xylene     | 3077                         | $1 \times 10^{-1}$             |                                                      |                                                                     |                                                                     |
| o-Xylene     | 2760                         | $1 \times 10^{-1}$             |                                                      |                                                                     |                                                                     |
| p-Xylene     | 7533                         | $1 \times 10^{-1}$             |                                                      |                                                                     |                                                                     |
| Cyclohexane  | 7187                         | $6 \times 10^{-10}$            |                                                      |                                                                     |                                                                     |
| Nonane       | 773                          | $2 \times 10^{-2}$             |                                                      |                                                                     |                                                                     |
